# Supplementary material
Source: PubMed Central journal article supplement (PMC6456874)
Supplement: pr8b00821_si_001.pdf [file pr8b00821_si_001.pdf]

## **Supporting Information**

### **Title**

Pre-fractionation extends, but also creates a bias in the detectable HLA class I ligandome

### **Authors**

Laura C. Demmers<sup>1,2</sup>, Albert J.R. Heck<sup>1,2</sup>, Wei Wu<sup>1,2\*</sup>

<sup>1</sup>Biomolecular Mass Spectrometry and Proteomics, Bijvoet Center for Biomolecular Research and Utrecht Institute for Pharmaceutical Sciences, Utrecht University, Padualaan 8, 3584 CH Utrecht, the Netherlands.

<sup>2</sup>Netherlands Proteomics Centre, Padualaan 8, 3584 CH Utrecht, the Netherlands.

\* to whom correspondence should be addressed: w.wu1@uu.nl

**Table of Contents**

|                                                                  |         |
|------------------------------------------------------------------|---------|
| Supplementary Figure S1-----                                     | page 3  |
| Supporting Table S1                                              |         |
| (A) Phosphopeptides identified by High pH-RP-----                | page 4  |
| (B) Phosphopeptides identified by SCX-----                       | page 9  |
| (C) Phosphopeptides identified without fractionation-----        | page 13 |
| Supporting Table S2                                              |         |
| (A) Citrullinated peptides identified by High pH-RP-----         | page 17 |
| (B) Citrullinated peptides identified by SCX-----                | page 21 |
| (C) Citrullinated peptides identified without fractionation----- | page 24 |

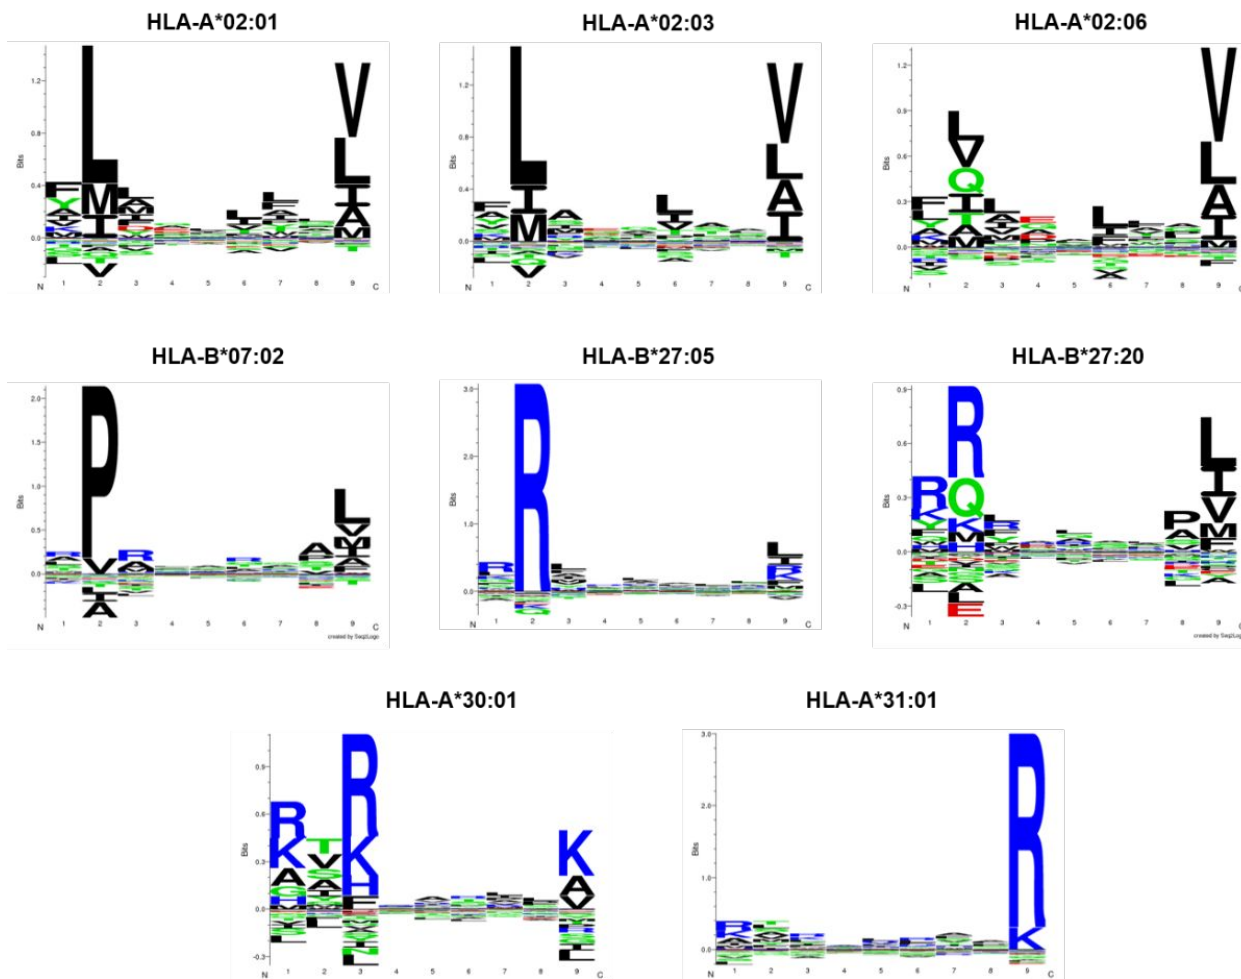

Supplementary Figure S1: Gibbs clustering motifs for nine different HLA types.

## Supporting Table S1

## (A) Phosphopeptides identified by High pH-RP

| Peptide      | Modification   | Localization Probability | Allele Assignment | Uniprot accession | Gene Name | Protein Name                                                              |
|--------------|----------------|--------------------------|-------------------|-------------------|-----------|---------------------------------------------------------------------------|
| RPQRATSNVF   | 1xPhospho [S7] | 100                      | HLA-B*07:02       | O14950            | MYL12B    | Myosin regulatory light chain 12B                                         |
| CIIGLSILLEL  | 1xPhospho [S6] | 100                      | Not Assigned      | O15397            | IPO8      | Importin-8                                                                |
| SPASPLKEL    | 1xPhospho [S4] | 100                      | HLA-B*07:02       | O43572            | AKAP10    | A-kinase anchor protein 10, mitochondrial                                 |
| APRTPSKRRGL  | 1xPhospho [S6] | 100                      | HLA-B*07:02       | O43663            | PRC1      | Protein regulator of cytokinesis 1                                        |
| SPSSPSVRRQL  | 1xPhospho [S4] | 100                      | HLA-B*07:02       | O75179            | ANKRD17   | Ankyrin repeat domain-containing protein 17                               |
| YPSFRRSSL    | 1xPhospho [S8] | 50                       | HLA-B*07:02       | O95071            | UBR5      | E3 ubiquitin-protein ligase UBR5                                          |
| HRYSTPHAF    | 1xPhospho [S4] | 100                      | HLA-C*07:02       | P04049            | RAF1      | RAF proto-oncogene serine/threonine-protein kinase                        |
| RQLSSGVSEI   | 1xPhospho [S4] | 50                       | HLA-A*02:01       | P04792            | HSPB1     | Heat shock protein beta-1                                                 |
| RQISIRGIVGV  | 1xPhospho [S4] | 100                      | Not Assigned      | P06737            | PYGL      | Glycogen phosphorylase, liver form                                        |
| RTASKRASRSL  | 1xPhospho [S4] | 100                      | Not Assigned      | P11171            | EPB41     | Protein 4.1                                                               |
| RPKSNIVLL    | 1xPhospho [S4] | 100                      | HLA-B*07:02       | P11836            | MS4A1     | B-lymphocyte antigen CD20                                                 |
| RLYSVSYLL    | 1xPhospho [S4] | 100                      | HLA-A*02:01       | P21333            | FLNA      | Filamin-A                                                                 |
| KPRSPVVEL    | 1xPhospho [S4] | 100                      | HLA-B*07:02       | P25098            | GRK2      | Beta-adrenergic receptor kinase 1                                         |
| LQLSPLKGLSL  | 1xPhospho [S4] | 100                      | Not Assigned      | P31350            | RRM2      | Ribonucleoside-diphosphate reductase subunit M2                           |
| KLIDRTESEL   | 1xPhospho [S8] | 100                      | HLA-A*02:01       | P33241            | LSP1      | Lymphocyte-specific protein 1                                             |
| IRSSYIRVL    | 1xPhospho [S4] | 100                      | HLA-C*07:02       | P33992            | MCM5      | DNA replication licensing factor MCM5                                     |
| KILSLVGLS    | 1xPhospho [S9] | 100                      | Not Assigned      | P42338            | PIK3CB    | Phosphatidylinositol 4,5-bisphosphate 3-kinase catalytic subunit beta     |
| RRLSFLVSY    | 1xPhospho [S4] | 100                      | HLA-C*07:02       | P47897            | QARS      | Glutamine--tRNA ligase (EC 6.1.1.18) (Glutaminyl-tRNA synthetase) (GlnRS) |
| KPFKLSGLSF   | 1xPhospho [S9] | 100                      | HLA-B*07:02       | P49006            | MARCKSL1  | MARCKS-related protein                                                    |
| KRFSGTVRL    | 1xPhospho [S4] | 100                      | HLA-C*07:02       | P62906            | RPL10A    | 60S ribosomal protein L10a                                                |
| RPQKVCNFL    | 1xPhospho [S7] | 100                      | HLA-B*07:02       | P63218            | GNG5      | Guanine nucleotide-binding protein G(I)/G(S)/G(O) subunit gamma-5         |
| RPRSPGSNSKVP | 1xPhospho [S4] | 100                      | HLA-B*07:02       | P78347            | GTF2I     | General transcription factor II-I                                         |
| RPRSPGSNSKV  | 1xPhospho [S4] | 100                      | HLA-B*07:02       | P78347            | GTF2I     | General transcription factor II-I                                         |
| VRPLGSENLLL  | 1xPhospho [S6] | 100                      | Not Assigned      | P98196            | ATP11A    | Probable phospholipid-transporting ATPase 1H                              |
| RQISQDVKL    | 1xPhospho [S4] | 100                      | Not Assigned      | Q01433            | AMPD2     | AMP deaminase 2                                                           |

| Peptide      | Modification       | Localization Probability           | Allele Assignment | Uniprot accession | Gene Name | Protein Name                                                |
|--------------|--------------------|------------------------------------|-------------------|-------------------|-----------|-------------------------------------------------------------|
| FASGQLLKFL   | 1xPhospho [S3]     | 100                                | HLA-A*02:01       | Q01638            | IL1RL1    | Interleukin-1 receptor-like 1                               |
| PGSQNNLLLK   | 1xPhospho [S3]     | 100                                | Not Assigned      | Q05707            | COL14A1   | Collagen alpha-1(XIV) chain                                 |
| RPRTSSNASTI  | 1xPhospho [S5]     | 50                                 | HLA-B*07:02       | Q12778            | FOXO1     | Forkhead box protein O1                                     |
| RLIESLFT     | 1xPhospho [S5]     | 100                                | Not Assigned      | Q12789            | GTF3C1    | General transcription factor 3C polypeptide 1               |
| RPRSAVLL     | 1xPhospho [S4]     | 100                                | HLA-B*07:02       | Q12802            | AKAP13    | A-kinase anchor protein 13                                  |
| RPRSAVLLV    | 1xPhospho [S4]     | 100                                | HLA-B*07:02       | Q12802            | AKAP13    | A-kinase anchor protein 13                                  |
| KPSSLRRVTI   | 1xPhospho [S4]     | 100                                | HLA-B*07:02       | Q12912            | LRMP      | Lymphoid-restricted membrane protein                        |
| SPRSPSTTYL   | 1xPhospho [S4]     | 99.2                               | HLA-B*07:02       | Q13111            | CHAF1A    | Chromatin assembly factor 1 subunit A                       |
| WSPVFRNYI    | 1xPhospho [S2]     | 100                                | Not Assigned      | Q13144            | EIF2B5    | Translation initiation factor eIF-2B subunit epsilon        |
| YMLSKSLYP    | 1xPhospho [S6]     | 100                                | HLA-A*02:01       | Q13224            | GRIN2B    | Glutamate receptor ionotropic, NMDA 2B                      |
| RRYSDPPTY    | 1xPhospho [S4]     | 100                                | HLA-C*07:02       | Q13459            | MYO9B     | Unconventional myosin-IXb                                   |
| APRKGSFSAL   | 1xPhospho [S6]     | 100                                | HLA-B*07:02       | Q13619            | CUL4A     | Cullin-4A                                                   |
| RAALRSCSL    | 1xPhospho [S8]     | 50                                 | HLA-B*07:02       | Q14318            | FKBP8     | Peptidyl-prolyl cis-trans isomerase FKBP8                   |
| RPYSPSQYAL   | 1xPhospho [S4]     | 99.3                               | HLA-B*07:02       | Q14494            | NFE2L1    | Endoplasmic reticulum membrane sensor NFE2L1                |
| RPSTPKDSEL   | 1xPhospho [S3]     | 100                                | HLA-B*07:02       | Q14693            | LPIN1     | Phosphatidate phosphatase LPIN1                             |
| RVRKLPSTTL   | 1xPhospho [S7]     | 100                                | HLA-B*07:02       | Q15418            | RPS6KA1   | Ribosomal protein S6 kinase alpha-1 S6 kinase               |
| RPTSRLNRL    | 1xPhospho [S4]     | 100                                | HLA-B*07:02       | Q15788            | NCOA1     | Nuclear receptor coactivator 1                              |
| RPISPGLSY    | 1xPhospho [S4]     | 100                                | HLA-B*07:02       | Q16204            | CCDC6     | Coiled-coil domain-containing protein 6                     |
| SPRRSRSISLRR | 2xPhospho [S5; S7] | S(5): 66.7; S(7): 66.7; S(9): 66.7 | HLA-B*07:02       | Q16629            | SRSF7     | Serine/arginine-rich splicing factor 7                      |
| SPRRSRSISL   | 1xPhospho [S]      | S(5): 0.4; S(7): 49.8; S(9): 49.8  | HLA-B*07:02       | Q16629            | SRSF7     | Serine/arginine-rich splicing factor 7                      |
| HPRSPNVLSV   | 1xPhospho [S4]     | 100                                | HLA-B*07:02       | Q16665            | HIF1A     | Hypoxia-inducible factor 1-alpha                            |
| KKDKHKKAKKE  | 1xPhospho [S6]     | 100                                | Not Assigned      | Q2TBE0            | CWF19L2   | CWF19-like protein 2                                        |
| VPTSPKGRLL   | 1xPhospho [S4]     | 100                                | HLA-B*07:02       | Q53EL6            | PDCD4     | Programmed cell death protein 4                             |
| RLGSFHELLL   | 1xPhospho [S4]     | 100                                | HLA-A*02:01       | Q5H9R7            | PPP6R3    | Serine/threonine-protein phosphatase 6 regulatory subunit 3 |
| KMVPSIPYLG I | 1xPhospho [S5]     | 100                                | HLA-A*02:01       | Q5JS13            | RALGPS1   | Ras-specific guanine nucleotide-releasing factor RalGPS1    |
| RVRESSCLAL   | 1xPhospho [S6]     | 98.9                               | HLA-B*07:02       | Q5VYK3            | ECPAS     | Proteasome adapter and scaffold protein ECM29               |
| RPFHGISTVSL  | 1xPhospho [S10]    | 100                                | HLA-B*07:02       | Q5VZ89            | DENND4C   | DENN domain-containing protein 4C                           |

| Peptide     | Modification   | Localization Probability | Allele Assignment | Uniprot accession | Gene Name | Protein Name                                        |
|-------------|----------------|--------------------------|-------------------|-------------------|-----------|-----------------------------------------------------|
| RRSSQSWSL   | 1xPhospho [S]  | S(3): 50.0; S(4): 50.0   | HLA-C*07:02       | Q641Q2            | WASHC2A   | WASH complex subunit 2A                             |
| APRRYSSSL   | 1xPhospho [S6] | 100                      | HLA-B*07:02       | Q68EM7            | ARHGAP17  | Rho GTPase-activating protein 17                    |
| RRFSGTAVY   | 1xPhospho [S4] | 100                      | HLA-C*07:02       | Q6AHZ1            | ZNF518A   | Zinc finger protein 518A                            |
| KIFSGVFKV   | 1xPhospho [S4] | 100                      | HLA-A*02:01       | Q6DK11            | RPL7L1    | 60S ribosomal protein L7-like 1                     |
| RPAFFSPSL   | 1xPhospho [S6] | 100                      | HLA-B*07:02       | Q6ICG6            | KIAA0930  | Uncharacterized protein KIAA0930                    |
| KPASPKFIVTL | 1xPhospho [S4] | 100                      | HLA-B*07:02       | Q6PJT7            | ZC3H14    | Zinc finger CCCH domain-containing protein 14       |
| KRVSFSEQL   | 1xPhospho [S4] | 100                      | Not Assigned      | Q6WKZ4            | RAB11FIP1 | Rab11 family-interacting protein 1                  |
| QRKSKLQSL   | 1xPhospho [S4] | 100                      | Not Assigned      | Q6ZMZ3            | SYNE3     | Nesprin-3                                           |
| KIYSRLLSL   | 1xPhospho [S4] | 100                      | HLA-A*02:01       | Q6ZS30            | NBEAL1    | Neurobeachin-like protein 1                         |
| FINPLSALQSI | 1xPhospho [S6] | 100                      | Not Assigned      | Q6ZSZ6            | TSHZ1     | Teashirt homolog 1                                  |
| PRASTPRPL   | 1xPhospho [S4] | 100                      | HLA-C*07:02       | Q6ZVL6            | KIAA1549L | UPF0606 protein                                     |
| KPRRFSRSL   | 1xPhospho [S6] | 100                      | HLA-B*07:02       | Q7L4I2            | RSRC2     | Arginine/serine-rich coiled-coil protein 2          |
| RPDSPTRPTL  | 1xPhospho [S4] | 100                      | HLA-B*07:02       | Q7RTP6            | MICAL3    | [F-actin]-monooxygenase MICAL3                      |
| VPREVLRLSL  | 1xPhospho [S9] | 100                      | HLA-B*07:02       | Q7Z591            | AKNA      | AT-hook-containing transcription factor             |
| KPRSPRALVL  | 1xPhospho [S4] | 100                      | HLA-B*07:02       | Q86TG7            | PEG10     | Retrotransposon-derived protein PEG10               |
| KPRSPRALVLP | 1xPhospho [S4] | 100                      | HLA-B*07:02       | Q86TG7            | PEG10     | Retrotransposon-derived protein PEG10               |
| KPRSPRALV   | 1xPhospho [S4] | 100                      | HLA-B*07:02       | Q86TG7            | PEG10     | Retrotransposon-derived protein PEG10               |
| KPRSPRAL    | 1xPhospho [S4] | 100                      | HLA-B*07:02       | Q86TG7            | PEG10     | Retrotransposon-derived protein PEG10               |
| SPRRSLYKL   | 1xPhospho [S5] | 100                      | HLA-B*07:02       | Q86UA6            | RPAIN     | RPA-interacting protein                             |
| RPFSPREAL   | 1xPhospho [S4] | 100                      | HLA-B*07:02       | Q86V48            | LUZP1     | Leucine zipper protein 1                            |
| LPRNNSIGESL | 1xPhospho [S6] | 100                      | HLA-B*07:02       | Q86VY9            | TMEM200A  | Transmembrane protein 200A                          |
| RPRARSVDAL  | 1xPhospho [S6] | 100                      | HLA-B*07:02       | Q86X29            | LSR       | Lipolysis-stimulated lipoprotein receptor           |
| ALGSRESLATL | 1xPhospho [S4] | 100                      | Not Assigned      | Q86YV0            | RASAL3    | RAS protein activator like-3                        |
| EIRDLSSSFR  | 1xPhospho [S8] | 97.6                     | Not Assigned      | Q8N3F8            | MICALL1   | MICAL-like protein 1                                |
| RKFSEPNTY   | 1xPhospho [S4] | 100                      | Not Assigned      | Q8N4X5            | AFAP1L2   | Actin filament-associated protein 1-like 2          |
| SSIPRWLLEI  | 1xPhospho [S2] | 50                       | Not Assigned      | Q8NHP6            | MOSPD2    | Motile sperm domain-containing protein 2            |
| RLASLNAEAL  | 1xPhospho [S4] | 100                      | HLA-A*02:01       | Q8TBE0            | BAHD1     | Bromo adjacent homology domain-containing 1 protein |

| Peptide      | Modification      | Localization Probability | Allele Assignment | Uniprot accession | Gene Name | Protein Name                                              |
|--------------|-------------------|--------------------------|-------------------|-------------------|-----------|-----------------------------------------------------------|
| SPHSPFYQL    | 1xPhospho [S4]    | 100                      | HLA-B*07:02       | Q8TEK3            | DOT1L     | Histone-lysine N-methyltransferase, H3 lysine-79 specific |
| SPASPKISL    | 1xPhospho [S4]    | 100                      | HLA-B*07:02       | Q8WWM7            | ATXN2L    | Ataxin-2-like protein                                     |
| RPRDTRRISL   | 1xPhospho [S9]    | 100                      | HLA-B*07:02       | Q92508            | PIEZO1    | Piezo-type mechanosensitive ion channel component 1       |
| RPRANSGGVDL  | 1xPhospho [S6]    | 100                      | HLA-B*07:02       | Q92766            | RREB1     | Ras-responsive element-binding protein 1                  |
| KRASGQAFEL   | 1xPhospho [S4]    | 100                      | Not Assigned      | Q93045            | STMN2     | Stathmin-2                                                |
| KSINFLHQV    | 1xPhospho [S2]    | 100                      | HLA-A*02:01       | Q96CW5            | TUBGCP3   | Gamma-tubulin complex component 3                         |
| FRRSPTKSSL   | 1xPhospho [S4]    | 100                      | Not Assigned      | Q96PK6            | RBM14     | RNA-binding protein 14                                    |
| RLYSRFTSL    | 1xPhospho [S4]    | 100                      | HLA-A*02:01       | Q99653            | CHP1      | Calcineurin B homologous protein 1                        |
| RPRSPRQNSI   | 1xPhospho [S4]    | 100                      | HLA-B*07:02       | Q99700            | ATXN2L    | Ataxin-2                                                  |
| RRPSQNAISF   | 1xPhospho [S4]    | 100                      | HLA-B*07:02       | Q9BXB4            | OSBPL11   | Oxysterol-binding protein-related protein 11              |
| RPDSRLGKTEL  | 1xPhospho [S4]    | 100                      | HLA-B*07:02       | Q9BYW2            | SETD2     | Histone-lysine N-methyltransferase SETD2                  |
| RQASLSISV    | 1xPhospho [S4]    | 100                      | HLA-A*02:01       | Q9BZL6            | PRKD2     | Serine/threonine-protein kinase D2                        |
| RPRSAVEQL    | 1xPhospho [S4]    | 100                      | HLA-B*07:02       | Q9HAU0            | PLEKHA5   | Pleckstrin homology domain-containing family A member 5   |
| KPLSRVTSL    | 1xPhospho [S8]    | 100                      | HLA-B*07:02       | Q9NR81            | ARHGEF3   | Rho guanine nucleotide exchange factor 3                  |
| RPRIPSPIGF   | 1xPhospho [S6]    | 100                      | HLA-B*07:02       | Q9NRA8            | EIF4ENIF1 | Eukaryotic translation initiation factor 4E transporter   |
| RPWSNSRGL    | 1xPhospho [S4]    | 50                       | HLA-B*07:02       | Q9NRR8            | CDC42SE1  | CDC42 small effector protein 1                            |
| RLLSAAENFL   | 1xPhospho [S4]    | 100                      | HLA-A*02:01       | Q9NSI8            | SAMSN1    | SAM domain-containing protein SAMSN-1                     |
| RPYSPPFFSL   | 1xPhospho [S4]    | 100                      | HLA-B*07:02       | Q9NYF3            | FAM53C    | Protein FAM53C                                            |
| SPRAPVSPLKF  | 1xPhospho [S7]    | 100                      | HLA-B*07:02       | Q9UBS0            | RPS6KB2   | Ribosomal protein S6 kinase beta-2                        |
| RPSSARRHHL   | 1xPhospho [S4]    | 100                      | HLA-B*07:02       | Q9UIS9            | MBD1      | Methyl-CpG-binding domain protein 1                       |
| FVAVSGIILVGL | 1xPhospho [S5]    | 100                      | Not Assigned      | Q9UKR8            | TSPAN16   | Tetraspanin-16                                            |
| TPAQPQRRSL   | 1xPhospho [S9]    | 100                      | HLA-B*07:02       | Q9ULW0            | TPX2      | Targeting protein for Xklp2                               |
| SPRSSLNNSL   | 1xPhospho [S9]    | 100                      | HLA-B*07:02       | Q9UPW0            | FOXJ3     | Forkhead box protein J3                                   |
| IPRSLAKCSAL  | 1xPhospho [S9]    | 100                      | HLA-B*07:02       | Q9UQ13            | SHOC2     | Leucine-rich repeat protein SHOC-2                        |
| RISSRRSRSL   | 2xPhospho [S7; S] | S(7): 100.0; S(9): 100.0 | HLA-B*07:02       | Q9UQ35            | SRRM2     | Serine/arginine repetitive matrix protein 2               |
| RQISFKAEV    | 1xPhospho [S4]    | 100                      | HLA-A*02:01       | Q9Y385            | UBE2J1    | Ubiquitin-conjugating enzyme E2 J1                        |
| GPRSASLLSL   | 1xPhospho [S6]    | 100                      | HLA-B*07:02       | Q9Y4H4            | GPSM3     | G-protein-signaling modulator 3                           |

| Peptide    | Modification   | Localization Probability | Allele Assignment | Uniprot accession | Gene Name | Protein Name                   |
|------------|----------------|--------------------------|-------------------|-------------------|-----------|--------------------------------|
| RVWEDRPSSA | 1xPhospho [S9] | 99                       | Not Assigned      | Q9Y618            | NCOR2     | Nuclear receptor corepressor 2 |
| RPPYNRAVSL | 1xPhospho [S9] | 100                      | HLA-B*07:02       | Q9Y6Q9            | NCOA3     | Nuclear receptor coactivator 3 |



(B) Phosphopeptides identified by SCX

| Peptide      | Modification   | Localization Probability | Allele Assignment | Uniprot accession | Gene Name | Protein Name                                                           |
|--------------|----------------|--------------------------|-------------------|-------------------|-----------|------------------------------------------------------------------------|
| RPQRATSNVF   | 1xPhospho [S7] | 100                      | HLA-B*07:02       | O14950            | MYL12B    | Myosin regulatory light chain 12B                                      |
| RTSSKRVSRL   | 1xPhospho [S4] | 99.3                     | Not Assigned      | O43491            | EPB41L2   | Band 4.1-like protein 2                                                |
| SPSSPSVRRQL  | 1xPhospho [S4] | 100                      | HLA-B*07:02       | O75179            | ANKRD17   | Ankyrin repeat domain-containing protein 17                            |
| YPSFRRSSL    | 1xPhospho [S8] | N/A                      | HLA-B*07:02       | O95071            | UBR5      | E3 ubiquitin-protein ligase UBR5                                       |
| RQLSSGVSEI   | 1xPhospho [S4] | 99.4                     | HLA-A*02:01       | P04792            | HSPB1     | Heat shock protein beta-1                                              |
| LKPSETLSLTC  | 1xPhospho [S8] | 100                      | Not Assigned      | P06331            | IGHV4-34  | Immunoglobulin heavy variable 4-34                                     |
| SAPVGASEIAEE | 1xPhospho [S1] | N/A                      | Not Assigned      | P0CG23            | ZNF853    | Zinc finger protein 853                                                |
| RTASKRASRSL  | 1xPhospho [S4] | 100                      | Not Assigned      | P11171            | EPB41     | Protein 4.1                                                            |
| RPKSNIVLL    | 1xPhospho [S4] | 100                      | HLA-B*07:02       | P11836            | MS4A1     | B-lymphocyte antigen CD20                                              |
| KPRSPVVEL    | 1xPhospho [S4] | 100                      | HLA-B*07:02       | P25098            | GRK2      | Beta-adrenergic receptor kinase 1                                      |
| KLIDRTESL    | 1xPhospho [S8] | 100                      | HLA-A*02:01       | P33241            | LSP1      | Lymphocyte-specific protein 1                                          |
| PRRSLEQNIQL  | 1xPhospho [S4] | 100                      | Not Assigned      | P33993            | MCM7      | DNA replication licensing factor MCM7                                  |
| KPRSAASL     | 1xPhospho [S4] | 100                      | HLA-B*07:02       | P48736            | PIK3CG    | Phosphatidylinositol 4,5-bisphosphate 3-kinase catalytic subunit gamma |
| SPFKRQLSL    | 1xPhospho [S8] | 100                      | HLA-B*07:02       | P49757            | NUMB      | Protein numb homolog                                                   |
| AVALSIALLI   | 1xPhospho [S5] | 100                      | Not Assigned      | P56750            | CLDN17    | Claudin-17                                                             |
| LRLSVLVSL    | 1xPhospho [S8] | 100                      | Not Assigned      | P59535            | TAS2R40   | Taste receptor type 2 member 40                                        |
| RPRSSNAETL   | 1xPhospho [S4] | 98.8                     | HLA-B*07:02       | P61289            | PSME3     | Proteasome activator complex subunit 3                                 |
| KRFSGTVRL    | 1xPhospho [S4] | 100                      | HLA-C*07:02       | P62906            | RPL10A    | 60S ribosomal protein L10a                                             |
| RPRSPGSNSKV  | 1xPhospho [S4] | 100                      | HLA-B*07:02       | P78347            | GTF2I     | General transcription factor II-I                                      |
| RSRSVPSSL    | 1xPhospho [S4] | 99.3                     | HLA-B*07:02       | P83369            | LSM11     | U7 snRNA-associated Sm-like protein LSm11                              |
| RQISQDVKL    | 1xPhospho [S4] | 100                      | Not Assigned      | Q01433            | AMPD2     | AMP deaminase 2                                                        |
| ISSSILYVH    | 1xPhospho [S3] | 99.4                     | Not Assigned      | Q03938            | ZNF90     | Zinc finger protein 90                                                 |
| KPSSLRRVTI   | 1xPhospho [S4] | 100                      | HLA-B*07:02       | Q12912            | LRMP      | Lymphoid-restricted membrane protein                                   |
| SPRSPSTTYL   | 1xPhospho [S4] | 100                      | HLA-B*07:02       | Q13111            | CHAF1A    | Chromatin assembly factor 1 subunit A                                  |
| RRYSDPPTY    | 1xPhospho [S4] | 100                      | HLA-C*07:02       | Q13459            | MYO9B     | Unconventional myosin-IXb                                              |

| Peptide      | Modification   | Localization Probability                       | Allele Assignment | Uniprot accession | Gene Name | Protein Name                                      |
|--------------|----------------|------------------------------------------------|-------------------|-------------------|-----------|---------------------------------------------------|
| APRKGFSFAL   | 1xPhospho [S6] | 100                                            | HLA-B*07:02       | Q13619            | CUL4A     | Cullin-4A                                         |
| RPRSPPRHQ    | 1xPhospho [S4] | 100                                            | HLA-B*07:02       | Q14493            | SLBP      | Histone RNA hairpin-binding protein               |
| RPSTPKSDSEL  | 1xPhospho [S3] | 100                                            | HLA-B*07:02       | Q14693            | LPIN1     | Phosphatidate phosphatase LPIN1                   |
| APRRPSRKGL   | 1xPhospho [S6] | 100                                            | HLA-B*07:02       | Q14839            | CHD4      | Chromodomain-helicase-DNA-binding protein 4       |
| RVRKLPSTTL   | 1xPhospho [S7] | 100                                            | HLA-B*07:02       | Q15418            | RPS6KA1   | Ribosomal protein S6 kinase alpha-1               |
| SPRRRSISL    | 1xPhospho [S]  | S(7): 50.0; S(9): 50.0                         | HLA-B*07:02       | Q16629            | SRSF7     | Serine/arginine-rich splicing factor 7            |
| HPRSPNVLSV   | 1xPhospho [S4] | 100                                            | HLA-B*07:02       | Q16665            | HIF1A     | Hypoxia-inducible factor 1-alpha                  |
| RPRSNSGREL   | 1xPhospho [S6] | 99.3                                           | HLA-B*07:02       | Q5JSH3            | WDR44     | WD repeat-containing protein 44                   |
| SPKSGSPKSSSL | 1xPhospho [S6] | 100                                            | HLA-B*07:02       | Q5TCZ1            | SH3PXD2A  | SH3 and PX domain-containing protein 2A           |
| RRSSQSWSL    | 1xPhospho [S4] | S(3): 50.0; S(4): 50.0                         | HLA-C*07:02       | Q641Q2            | WASHC2A   | WASH complex subunit 2A                           |
| APRRYSSSL    | 1xPhospho [S6] | 100                                            | HLA-B*07:02       | Q68EM7            | ARHGAP17  | Rho GTPase-activating protein 17                  |
| RRFSGTAVY    | 1xPhospho [S4] | 100                                            | HLA-C*07:02       | Q6AHZ1            | ZNF518A   | Zinc finger protein 518A                          |
| KPASP KFIVTL | 1xPhospho [S4] | 100                                            | HLA-B*07:02       | Q6PJT7            | ZC3H14    | Zinc finger CCCH domain-containing protein 14     |
| KPRRFSRSL    | 1xPhospho [S6] | 100                                            | HLA-B*07:02       | Q7L4I2            | RSRC2     | Arginine/serine-rich coiled-coil protein 2        |
| RSSARQALGITI | 1xPhospho [S3] | S(2): 50.0; S(3): 50.0                         | Not Assigned      | Q7Z7G8            | VPS13B    | Vacuolar protein sorting-associated protein 13B   |
| KPRSPPRALVL  | 1xPhospho [S4] | 100                                            | HLA-B*07:02       | Q86TG7            | PEG10     | Retrotransposon-derived protein PEG10             |
| KPRSPPRALVLP | 1xPhospho [S4] | 100                                            | HLA-B*07:02       | Q86TG7            | PEG10     | Retrotransposon-derived protein PEG10             |
| RSPPRALVLP   | 1xPhospho [S2] | 100                                            | Not Assigned      | Q86TG7            | PEG10     | Retrotransposon-derived protein PEG10             |
| KPRSPPRALV   | 1xPhospho [S4] | 100                                            | HLA-B*07:02       | Q86TG7            | PEG10     | Retrotransposon-derived protein PEG10             |
| RSPPRALVL    | 1xPhospho [S2] | 100                                            | Not Assigned      | Q86TG7            | PEG10     | Retrotransposon-derived protein PEG10             |
| KPRSPPRAL    | 1xPhospho [S4] | 100                                            | HLA-B*07:02       | Q86TG7            | PEG10     | Retrotransposon-derived protein PEG10             |
| RPRARSVDAL   | 1xPhospho [S6] | 100                                            | HLA-B*07:02       | Q86X29            | LSR       | Lipolysis-stimulated lipoprotein receptor         |
| GPRSPKAWL    | 1xPhospho [S4] | 100                                            | HLA-B*07:02       | Q8IV32            | CCDC71    | Coiled-coil domain-containing protein 71          |
| RKFSEPN TY   | 1xPhospho [S4] | N/A                                            | Not Assigned      | Q8N4X5            | AFAP1L2   | Actin filament-associated protein 1-like 2        |
| GRTSELILHQRL | 1xPhospho [S4] | 100                                            | Not Assigned      | Q8N9K5            | ZNF565    | Zinc finger protein 565                           |
| RPRRSYSSTSI  | 1xPhospho [S6] | S(4): 0.3; S(6): 33.2; S(8): 33.2; S(9): 33.2; | HLA-B*07:02       | Q8NFH8            | REPS2     | RalBP1-associated Eps domain-containing protein 2 |

| Peptide       | Modification   | Localization Probability | Allele Assignment | Uniprot accession | Gene Name | Protein Name                                            |
|---------------|----------------|--------------------------|-------------------|-------------------|-----------|---------------------------------------------------------|
| SPASPKISL     | 1xPhospho [S4] | 100                      | HLA-B*07:02       | Q8WWM7            | ATXN2L    | Ataxin-2-like protein                                   |
| RPRDTRRISL    | 1xPhospho [S9] | 100                      | HLA-B*07:02       | Q92508            | PIEZO1    | Piezo-type mechanosensitive ion channel component 1     |
| RRSSIQSTF     | 1xPhospho [S3] | 99.4                     | HLA-C*07:02       | Q92542            | NCSTN     | Nicastrin                                               |
| RPRANSGGVDL   | 1xPhospho [S6] | 100                      | HLA-B*07:02       | Q92766            | RREB1     | Ras-responsive element-binding protein 1                |
| KRASGQAFEL    | 1xPhospho [S4] | 100                      | Not Assigned      | Q93045            | STMN2     | Stathmin-2                                              |
| SPRRSPRISF    | 1xPhospho [S5] | 100                      | HLA-B*07:02       | Q96FF9            | CDCA5     | Sororin                                                 |
| RPRSPTGPSNSF  | 1xPhospho [S4] | 100                      | HLA-B*07:02       | Q96I25            | RBM17     | Splicing factor 45                                      |
| FRRSPTKSSLDY  | 1xPhospho [S4] | 100                      | Not Assigned      | Q96PK6            | RBM14     | RNA-binding protein 14                                  |
| FRRSPTKSSL    | 1xPhospho [S4] | 100                      | Not Assigned      | Q96PK6            | RBM14     | RNA-binding protein 14                                  |
| FRRSPTKSSLD   | 1xPhospho [S4] | 100                      | Not Assigned      | Q96PK6            | RBM14     | RNA-binding protein 14                                  |
| RPRSLSSPTVTL  | 1xPhospho [S6] | 99.4                     | HLA-B*07:02       | Q96PU5            | NEDD4L    | E3 ubiquitin-protein ligase NEDD4-like                  |
| RSLSSPTVTL    | 1xPhospho [S4] | 99.4                     | HLA-A*02:01       | Q96PU5            | NEDD4L    | E3 ubiquitin-protein ligase NEDD4-like                  |
| RPRSLSSPTV    | 1xPhospho [S6] | N/A                      | HLA-B*07:02       | Q96PU5            | NEDD4L    | E3 ubiquitin-protein ligase NEDD4-like                  |
| RPRSPRQNSI    | 1xPhospho [S4] | 100                      | HLA-B*07:02       | Q99700            | ATXN2     | Ataxin-2                                                |
| RLSSRRSSIR    | 1xPhospho [S8] | N/A                      | Not Assigned      | Q9BRR9            | ARHGAP9   | Rho GTPase-activating protein 9                         |
| RRKSQVAEL     | 1xPhospho [S4] | 100                      | HLA-C*07:02       | Q9BYG3            | NIFK      | MKI67 FHA domain-interacting nucleolar phosphoprotein   |
| RPDSRLGKTEL   | 1xPhospho [S4] | 100                      | HLA-B*07:02       | Q9BYW2            | SETD2     | Histone-lysine N-methyltransferase SETD2                |
| PRSLALLRTL SV | 1xPhospho [S3] | 100                      | Not Assigned      | Q9H228            | S1PR5     | Sphingosine 1-phosphate receptor 5                      |
| KPLIRSQSL     | 1xPhospho [S8] | 100                      | HLA-B*07:02       | Q9H6H4            | REEP4     | Receptor expression-enhancing protein 4                 |
| SPRGSGSSTSL   | 1xPhospho [S7] | 49.8                     | HLA-B*07:02       | Q9H7P9            | PLEKHG2   | Pleckstrin homology domain-containing family G member 2 |
| RPRSAVEQL     | 1xPhospho [S4] | 100                      | HLA-B*07:02       | Q9HAU0            | PLEKHA5   | Pleckstrin homology domain-containing family A member 5 |
| RPWSNSRGL     | 1xPhospho [S4] | 0.5                      | HLA-B*07:02       | Q9NRR8            | CDC42SE1  | CDC42 small effector protein 1                          |
| RPYSPFFSL     | 1xPhospho [S4] | 100                      | HLA-B*07:02       | Q9NYF3            | FAM53C    | Protein FAM53C                                          |
| SPFLSKRSL     | 1xPhospho [S8] | 100                      | HLA-B*07:02       | Q9NYV4            | CDK12     | Cyclin-dependent kinase 12                              |
| SPRAPVSPLKF   | 1xPhospho [S7] | 100                      | HLA-B*07:02       | Q9UBS0            | RPS6KB2   | Ribosomal protein S6 kinase beta-2                      |
| TPAQPQRRSL    | 1xPhospho [S9] | 100                      | HLA-B*07:02       | Q9ULW0            | TPX2      | Targeting protein for Xklp2                             |
| SPRSSLNNSL    | 1xPhospho [S9] | 100                      | HLA-B*07:02       | Q9UPW0            | FOXJ3     | Forkhead box protein J3                                 |
| RISSRRSRSL    | 1xPhospho [S9] | 99.4                     | HLA-B*07:02       | Q9UQ35            | SRRM2     | Serine/arginine repetitive matrix protein 2             |

| Peptide     | Modification   | Localization Probability          | Allele Assignment | Uniprot accession | Gene Name | Protein Name                                      |
|-------------|----------------|-----------------------------------|-------------------|-------------------|-----------|---------------------------------------------------|
| KLRSPKSEL   | 1xPhospho [S4] | 100                               | HLA-B*07:02       | Q9Y2R2            | PTPN22    | Tyrosine-protein phosphatase non-receptor type 22 |
| RQISFKAEV   | 1xPhospho [S4] | 100                               | HLA-A*02:01       | Q9Y385            | UBE2J1    | Ubiquitin-conjugating enzyme E2 J1                |
| GPRSASLLSL  | 1xPhospho [S]  | S(4): 0.0; S(6): 0.0; S(9): 100.0 | HLA-B*07:02       | Q9Y4H4            | GPSM3     | G-protein-signaling modulator 3                   |
| QSNALLVQL   | 1xPhospho [S2] | 100                               | Not Assigned      | Q9Y5X0            | SNX10     | Sorting nexin-10                                  |
| INMTSSSSKHL | 1xPhospho [S8] | 98.7                              | Not Assigned      | Q9Y616            | IRAK3     | Interleukin-1 receptor-associated kinase 3        |
| RVWEDRPSSA  | 1xPhospho [S9] | N/A                               | Not Assigned      | Q9Y618            | NCOR2     | Nuclear receptor corepressor 2                    |

## (C) Phosphopeptides identified without fractionation

| Peptide     | Modification   | Localization Probability | Allele Assignment | Uniprot accession | Gene Name | Protein Name                                                           |
|-------------|----------------|--------------------------|-------------------|-------------------|-----------|------------------------------------------------------------------------|
| RPQRATSNVF  | 1xPhospho [S7] | 100                      | HLA-B*07:02       | O14950            | MYL12B    | Myosin regulatory light chain 12B (SHUJUN-1)                           |
| RKNSFVMEY   | 1xPhospho [S4] | 100                      | Not Assigned      | O43463            | SUV39H1   | Histone-lysine N-methyltransferase SUV39H1                             |
| SPSSPSVRRQL | 1xPhospho [S4] | 100                      | HLA-B*07:02       | O75179            | ANKRD17   | Ankyrin repeat domain-containing protein 17                            |
| RPNSSALETL  | 1xPhospho [S4] | 99.4                     | HLA-B*07:02       | O94804            | STK10     | Serine/threonine-protein kinase 10                                     |
| YPSFRRSSL   | 1xPhospho [S8] | 99.5                     | HLA-B*07:02       | O95071            | UBR5      | E3 ubiquitin-protein ligase UBR5                                       |
| KRYSGNMEY   | 1xPhospho [S4] | 100                      | HLA-C*07:02       | O95835            | LATS1     | Serine/threonine-protein kinase LATS1                                  |
| RQLSSGVSEI  | 1xPhospho [S4] | 50                       | HLA-A*02:01       | P04792            | HSPB1     | Heat shock protein beta-1                                              |
| RPKSNIVLL   | 1xPhospho [S4] | 100                      | HLA-B*07:02       | P11836            | MS4A1     | B-lymphocyte antigen CD20                                              |
| SPRTPVSPVKF | 1xPhospho [S7] | 100                      | HLA-B*07:02       | P23443            | RPS6KB1   | Ribosomal protein S6 kinase beta-1                                     |
| LPKSPPYTAF  | 1xPhospho [S4] | N/A                      | HLA-B*07:02       | P23588            | EIF4B     | Eukaryotic translation initiation factor 4B                            |
| LQLSPLKGLSL | 1xPhospho [S4] | 100                      | Not Assigned      | P31350            | RRM2      | Ribonucleoside-diphosphate reductase subunit M2                        |
| KLIDRTESL   | 1xPhospho [S8] | 100                      | HLA-A*02:01       | P33241            | LSP1      | Lymphocyte-specific protein 1                                          |
| RQASIELPSM  | 1xPhospho [S4] | 100                      | Not Assigned      | P33241            | LSP1      | Lymphocyte-specific protein 1                                          |
| KTVSQRFGLL  | 1xPhospho [S4] | 100                      | Not Assigned      | P42336            | PIK3CA    | Phosphatidylinositol 4,5-bisphosphate 3-kinase catalytic subunit alpha |
| RRGSLQAYTF  | 1xPhospho [S4] | 100                      | Not Assigned      | P46934            | NEDD4     | E3 ubiquitin-protein ligase NEDD4                                      |
| RRLSFLVSY   | 1xPhospho [S4] | 100                      | HLA-C*07:02       | P47897            | QARS      | Glutamine--tRNA ligase                                                 |
| RIVSQLLTL   | 1xPhospho [S4] | 100                      | HLA-A*02:01       | P55072            | VCP       | Transitional endoplasmic reticulum ATPase                              |
| KRFSGTVRL   | 1xPhospho [S4] | 100                      | HLA-C*07:02       | P62906            | RPL10A    | 60S ribosomal protein L10a                                             |
| YLWRTSLYL   | 1xPhospho [S6] | 100                      | HLA-A*02:01       | Q00325            | SLC25A3   | Phosphate carrier protein, mitochondrial                               |
| RQISQDVKL   | 1xPhospho [S4] | 100                      | Not Assigned      | Q01433            | AMPD2     | AMP deaminase 2                                                        |
| QSLLYELLY   | 1xPhospho [S2] | 100                      | Not Assigned      | Q01804            | OTUD4     | OTU domain-containing protein 4                                        |
| RRLSFLVL    | 1xPhospho [S4] | 100                      | HLA-C*07:02       | Q03518            | TAP1      | Antigen peptide transporter 1                                          |
| RPRLQHSFSF  | 1xPhospho [S9] | 100                      | HLA-B*07:02       | Q07352            | ZFP36L1   | mRNA decay activator protein ZFP36L1                                   |
| KPSSLRRVTI  | 1xPhospho [S4] | 100                      | HLA-B*07:02       | Q12912            | LRMP      | Lymphoid-restricted membrane protein                                   |
| SPRSPSTTYL  | 1xPhospho [S4] | 100                      | HLA-B*07:02       | Q13111            | CHAF1A    | Chromatin assembly factor 1 subunit A                                  |
| RRYSDPPTY   | 1xPhospho [S4] | 100                      | HLA-C*07:02       | Q13459            | MYO9B     | Unconventional myosin-IXb                                              |

| Peptide      | Modification       | Localization Probability         | Allele Assignment | Uniprot accession | Gene Name | Protein Name                                                        |
|--------------|--------------------|----------------------------------|-------------------|-------------------|-----------|---------------------------------------------------------------------|
| APRKGFSFAL   | 1xPhospho [S6]     | 100                              | HLA-B*07:02       | Q13619            | CUL4A     | Cullin-4A                                                           |
| FRKSMVEHY    | 1xPhospho [S4]     | 100                              | HLA-C*07:02       | Q14088            | RAB33A    | Ras-related protein Rab-33A                                         |
| RPYSPSQYAL   | 1xPhospho [S]      | S(4): 99.3; S(6): 0.7            | HLA-B*07:02       | Q14494            | NFE2L1    | Endoplasmic reticulum membrane sensor NFE2L1                        |
| RVRKLPSTTL   | 1xPhospho [S7]     | 100                              | HLA-B*07:02       | Q15418            | RPS6KA1   | Ribosomal protein S6 kinase alpha-1kinase 1a                        |
| RLFSKELRC    | 1xPhospho [S4]     | 100                              | Not Assigned      | Q15543            | TAF13     | Transcription initiation factor TFIIID subunit 13                   |
| SLNYTKVEQL   | 1xPhospho [S1]     | 100                              | HLA-A*02:01       | Q15555            | MAPRE2    | Microtubule-associated protein RP/EB family member 2                |
| IFVTLSIVVTV  | 1xPhospho [S6]     | 100                              | HLA-A*02:01       | Q15825            | CHRNA6    | Neuronal acetylcholine receptor subunit alpha-6                     |
| SPRRSRSISL   | 2xPhospho [S7; S9] | S(5): 0.6; S(7): 99.5; S(9): 0.0 | HLA-B*07:02       | Q16629            | SRSF7     | Serine/arginine-rich splicing factor 7                              |
| SPRRSRSISL   | 1xPhospho [S]      | S(5): 0.6; S(7): 99.5            | HLA-B*07:02       | Q16629            | SRSF7     | Serine/arginine-rich splicing factor 7                              |
| HPRSPNVLSV   | 1xPhospho [S4]     | 100                              | HLA-B*07:02       | Q16665            | HIF1A     | Hypoxia-inducible factor 1-alpha                                    |
| RLLDLGSSPSGV | 1xPhospho [S8]     | 33.3                             | HLA-A*02:01       | Q2TAC2            | CCDC57    | Coiled-coil domain-containing protein 57                            |
| RPFHGISTVSL  | 1xPhospho [S10]    | 100                              | HLA-B*07:02       | Q5VZ89            | DENND4C   | DENN domain-containing protein 4C                                   |
| RRSSQSWSL    | 1xPhospho [S4]     | 50                               | HLA-C*07:02       | Q641Q2            | WASHC2A   | WASH complex subunit 2A                                             |
| APRRYSSSL    | 1xPhospho [S6]     | 100                              | HLA-B*07:02       | Q68EM7            | ARHGAP17  | Rho GTPase-activating protein 17                                    |
| RRFSGTAVY    | 1xPhospho [S4]     | 100                              | HLA-C*07:02       | Q6AHZ1            | ZNF518A   | Zinc finger protein 518A                                            |
| KIFSGVFVKV   | 1xPhospho [S4]     | 100                              | HLA-A*02:01       | Q6DKI1            | RPL7L1    | 60S ribosomal protein L7-like 1                                     |
| MPRQPSATRL   | 1xPhospho [S6]     | 100                              | HLA-B*07:02       | Q6NZ67            | MZT2B     | Mitotic-spindle organizing protein 2B                               |
| KVLSTEEMEL   | 1xPhospho [S4]     | 100                              | HLA-A*02:01       | Q6NZ67            | MZT2B     | Mitotic-spindle organizing protein 2B                               |
| KPASPKFIVTL  | 1xPhospho [S4]     | 100                              | HLA-B*07:02       | Q6PJT7            | ZC3H14    | Zinc finger CCCH domain-containing protein 14                       |
| KPRRFSRSL    | 2xPhospho [S6; S8] | S(6): 100.0; S(8): 100.0         | HLA-B*07:02       | Q7L4I2            | RSRC2     | Arginine/serine-rich coiled-coil protein 2                          |
| KPRRFSRSL    | 1xPhospho [S6]     | S(6): 100.0; S(8): 100.0         | HLA-B*07:02       | Q7L4I2            | RSRC2     | Arginine/serine-rich coiled-coil protein 2                          |
| VPREVLRLSL   | 1xPhospho [S9]     | 100                              | HLA-B*07:02       | Q7Z591            | AKNA      | AT-hook-containing transcription factor                             |
| SPRPLSCLEL   | 1xPhospho [S6]     | 100                              | HLA-B*07:02       | Q7Z6I6            | ARHGAP30  | Rho GTPase-activating protein 30                                    |
| RPAKSMDSL    | 1xPhospho [S5]     | 100                              | HLA-B*07:02       | Q7Z6I6            | ARHGAP30  | Rho GTPase-activating protein 30                                    |
| AGSQLSQAMEV  | 1xPhospho [S3]     | 0.8                              | Not Assigned      | Q7Z6K3            | PTAR1     | Protein prenyltransferase alpha subunit repeat-containing protein 1 |
| KPRSPRALVL   | 1xPhospho [S4]     | 100                              | HLA-B*07:02       | Q86TG7            | PEG10     | Retrotransposon-derived protein PEG10                               |

| Peptide      | Modification       | Localization Probability | Allele Assignment | Uniprot accession | Gene Name | Protein Name                                            |
|--------------|--------------------|--------------------------|-------------------|-------------------|-----------|---------------------------------------------------------|
| KPRSPRALV    | 1xPhospho [S4]     | 100                      | HLA-B*07:02       | Q86TG7            | PEG10     | Retrotransposon-derived protein PEG10                   |
| KPRSPRALVLP  | 1xPhospho [S4]     | 100                      | HLA-B*07:02       | Q86TG7            | PEG10     | Retrotransposon-derived protein PEG10                   |
| RPFSPREAL    | 1xPhospho [S4]     | 100                      | HLA-B*07:02       | Q86V48            | LUZP1     | Leucine zipper protein 1                                |
| RPRARSVDAL   | 1xPhospho [S6]     | 100                      | HLA-B*07:02       | Q86X29            | LSR       | Lipolysis-stimulated lipoprotein receptor               |
| GPRSPKAWL    | 1xPhospho [S4]     | 100                      | HLA-B*07:02       | Q8IV32            | CCDC71    | Coiled-coil domain-containing protein 71                |
| RLLESNRKL    | 1xPhospho [S5]     | 100                      | HLA-A*02:01       | Q8NHP6            | MOSPD2    | Motile sperm domain-containing protein 2                |
| RTYSGPMNKV   | 1xPhospho [S4]     | 100                      | Not Assigned      | Q8WVV4            | POF1B     | Protein POF1B                                           |
| SPASPKISL    | 1xPhospho [S4]     | 100                      | HLA-B*07:02       | Q8WWM7            | ATXN2L    | Ataxin-2-like protein                                   |
| LSSEISQVRL   | 2xPhospho [S2; S3] | S(2): 100.0; S(3): 100.0 | Not Assigned      | Q8WXI4            | ACOT11    | Acyl-coenzyme A thioesterase 11                         |
| RPRDTRRISL   | 1xPhospho [S9]     | 100                      | HLA-B*07:02       | Q92508            | PIEZO1    | Piezo-type mechanosensitive ion channel component 1     |
| RPRANSGGVDL  | 1xPhospho [S6]     | 100                      | HLA-B*07:02       | Q92766            | RREB1     | Ras-responsive element-binding protein 1                |
| KRASGQAFEL   | 1xPhospho [S4]     | 100                      | Not Assigned      | Q93045            | STMN2     | Stathmin-2                                              |
| RILSLSWH     | 1xPhospho [S6]     | 100                      | Not Assigned      | Q969X6            | UTP4      | U3 small nucleolar RNA-associated protein 4 homolog     |
| PPSQLTSSSL   | 1xPhospho [S5]     | 50                       | Not Assigned      | Q96B97            | SH3KBP1   | SH3 domain-containing kinase-binding protein 1          |
| KSINFLHQV    | 1xPhospho [S2]     | N/A                      | HLA-A*02:01       | Q96CW5            | TUBGCP3   | Gamma-tubulin complex component 3                       |
| FRRSPTKSSL   | 1xPhospho [S4]     | 100                      | Not Assigned      | Q96PK6            | RBM14     | RNA-binding protein 14                                  |
| FRRSPTKSSLD  | 1xPhospho [S4]     | 100                      | Not Assigned      | Q96PK6            | RBM14     | RNA-binding protein 14                                  |
| FRRSPTKSSLDY | 1xPhospho [S4]     | 100                      | Not Assigned      | Q96PK6            | RBM14     | RNA-binding protein 14                                  |
| RPRSPRQNSI   | 1xPhospho [S4]     | 100                      | HLA-B*07:02       | Q99700            | ATXN2     | Ataxin-2                                                |
| RRPSQNAISF   | 1xPhospho [S4]     | 100                      | HLA-B*07:02       | Q9BXB4            | OSBPL11   | Oxysterol-binding protein-related protein 11            |
| RPDSRLGKTEL  | 1xPhospho [S4]     | 100                      | HLA-B*07:02       | Q9BYW2            | SETD2     | Histone-lysine N-methyltransferase SETD2                |
| HRSWVEKI     | 1xPhospho [S3]     | 100                      | Not Assigned      | Q9GZN4            | PRSS22    | Brain-specific serine protease 4                        |
| KPLIRSQSL    | 1xPhospho [S8]     | 100                      | HLA-B*07:02       | Q9H6H4            | REEP4     | Receptor expression-enhancing protein 4                 |
| RPRSAVEQL    | 1xPhospho [S4]     | 100                      | HLA-B*07:02       | Q9HAU0            | PLEKHA5   | Pleckstrin homology domain-containing family A member 5 |
| RPWSNSRGL    | 1xPhospho [S4]     | 100                      | HLA-B*07:02       | Q9NRR8            | CDC42SE1  | CDC42 small effector protein 1                          |
| RLLSAAENFL   | 1xPhospho [S4]     | 100                      | HLA-A*02:01       | Q9NSI8            | SAMSN1    | SAM domain-containing protein SAMSN-1                   |
| LTTILHSDGDL  | 1xPhospho [S7]     | 100                      | Not Assigned      | Q9NTI5            | PDS5B     | Sister chromatid cohesion protein PDS5 homolog B        |

| Peptide     | Modification   | Localization Probability | Allele Assignment | Uniprot accession | Gene Name | Protein Name                                                         |
|-------------|----------------|--------------------------|-------------------|-------------------|-----------|----------------------------------------------------------------------|
| KLYSSEQLLI  | 1xPhospho [S4] | 99.5                     | HLA-A*02:01       | Q9NX09            | DDIT4     | DNA damage-inducible transcript 4 protein                            |
| RPYSPPFFSL  | 1xPhospho [S4] | 100                      | HLA-B*07:02       | Q9NYF3            | FAM53C    | Protein FAM53C                                                       |
| APRHPSTNSLL | 1xPhospho [S6] | 100                      | HLA-B*07:02       | Q9P032            | NDUFAF4   | NADH dehydrogenase [ubiquinone] 1 alpha subcomplex assembly factor 4 |
| APRHPSTNSL  | 1xPhospho [S6] | 100                      | HLA-B*07:02       | Q9P032            | NDUFAF4   | NADH dehydrogenase [ubiquinone] 1 alpha subcomplex assembly factor 4 |
| SRKSFVFEL   | 1xPhospho [S4] | 100                      | HLA-C*07:02       | Q9P219            | CCDC88C   | Protein Daple                                                        |
| SPRAPVSPLKF | 1xPhospho [S7] | 100                      | HLA-B*07:02       | Q9UBS0            | RPS6KB2   | Ribosomal protein S6 kinase beta-2                                   |
| SPSINRQTSI  | 1xPhospho [S9] | 100                      | HLA-B*07:02       | Q9UJ41            | RABGEF1   | Rab5 GDP/GTP exchange factor                                         |
| TPAQPQRRSL  | 1xPhospho [S9] | 100                      | HLA-B*07:02       | Q9ULW0            | TPX2      | Targeting protein for Xklp2                                          |
| RQISFKAEV   | 1xPhospho [S4] | 100                      | HLA-A*02:01       | Q9Y385            | UBE2J1    | Ubiquitin-conjugating enzyme E2 J1                                   |
| GPRSASLLSL  | 1xPhospho [S6] | 100                      | HLA-B*07:02       | Q9Y4H4            | GPSM3     | G-protein-signaling modulator 3                                      |
| RPKSVDFDSL  | 1xPhospho [S4] | 100                      | HLA-B*07:02       | Q9Y5K6            | CD2AP     | CD2-associated protein                                               |
| RLDSYVRSL   | 1xPhospho [S4] | 100                      | HLA-A*02:01       | Q9Y5R8            | TRAPPC1   | Trafficking protein particle complex subunit 1                       |
| RVWEDRPSSA  | 1xPhospho [S9] | 99.3                     | Not Assigned      | Q9Y618            | NCOR2     | Nuclear receptor corepressor 2                                       |



## Supporting Table S2

## (A) Citrullinated peptides identified by High pH-RP

| Peptide      | Modification          | Allele Assignment | Uniprot accession | Gene Name | Protein Name                                                 |
|--------------|-----------------------|-------------------|-------------------|-----------|--------------------------------------------------------------|
| MDRVEEILEL   | 1xDeamidated [R3]     | Not Assigned      | A6PVC2            | TTLL8     | Protein monoglycylase TTLL8                                  |
| RPQRATSNVF   | 1xDeamidated [R4]     | HLA-B*07:02       | O14950            | MYL12B    | Myosin regulatory light chain 12B                            |
| RARNGEYITL   | 1xDeamidated [R3]     | HLA-B*07:02       | O15055            | PER2      | Period circadian protein homolog 2                           |
| TPRLPQRNLSL  | 1xDeamidated [R7]     | HLA-B*07:02       | O43516            | WIPF1     | WAS/WASL-interacting protein family member 1                 |
| PRSGPRPPLP   | 1xDeamidated [R6]     | Not Assigned      | O43516            | WIPF1     | WAS/WASL-interacting protein family member 1                 |
| APRNSAELTVI  | 1xDeamidated [R3]     | HLA-B*07:02       | O60566            | BUB1B     | Mitotic checkpoint serine/threonine-protein kinase BUB1 beta |
| RLLNTTDVYL   | 1xDeamidated [R1]     | HLA-A*02:01       | O75976            | CPD       | Carboxypeptidase D                                           |
| TQRAPGSVVELL | 1xDeamidated [R3]     | Not Assigned      | O95363            | FARS2     | Phenylalanine--tRNA ligase, mitochondrial                    |
| VPRDGRRAGNAL | 1xDeamidated [R7]     | HLA-B*07:02       | P0C1Z6            | TFPT      | TCF3 fusion partner                                          |
| QPREPQVYTL   | 1xDeamidated [R3]     | HLA-B*07:02       | P0DOX5            |           | Immunoglobulin gamma-1 heavy chain                           |
| AASKERNGLSL  | 1xDeamidated [R6]     | Not Assigned      | P16401            | HIST1H1B  | Histone H1.5                                                 |
| RKQQVLETV    | 1xDeamidated [R1]     | Not Assigned      | P17948            | FLT1      | Vascular endothelial growth factor receptor 1                |
| SPGERHGSRHQ  | 1xDeamidated [R9]     | Not Assigned      | P20930            | FLG       | Filaggrin                                                    |
| DGSRHSGSRHHE | 2xDeamidated [R4; R9] | Not Assigned      | P20930            | FLG       | Filaggrin                                                    |
| SPGERHGSRHQQ | 1xDeamidated [R9]     | Not Assigned      | P20930            | FLG       | Filaggrin                                                    |
| SKRMEPIAI    | 1xDeamidated [R3]     | Not Assigned      | P24588            | AKAP5     | A-kinase anchor protein 5                                    |
| VPNAGRGLVRL  | 1xDeamidated [R6]     | HLA-B*07:02       | P27695            | APEX1     | DNA-(apurinic or apyrimidinic site) lyase                    |
| APRGQRPESAL  | 1xDeamidated [R6]     | HLA-B*07:02       | P28062            | PSMB8     | Proteasome subunit beta type-8                               |
| NPRNFSDNQL   | 1xDeamidated [R3]     | HLA-B*07:02       | P37802            | TAGLN2    | Transgelin-2                                                 |
| RRSWQENISL   | 2xDeamidated [R1; R2] | Not Assigned      | P38935            | IGHMBP2   | DNA-binding protein SMUBP-2                                  |
| RPQTGLSFL    | 1xDeamidated [R1]     | HLA-B*07:02       | P43686            | PSMC4     | 26S proteasome regulatory subunit 6B                         |
| RLLDLDP RP   | 1xDeamidated [R8]     | Not Assigned      | P49913            | CAMP      | Cathelicidin antimicrobial peptide                           |
| RPTSRYNSSSI  | 2xDeamidated [R1; R5] | HLA-B*07:02       | P51116            | FXR2      | Fragile X mental retardation syndrome-related protein 2      |
| RLIEHQRM     | 1xDeamidated [R7]     | Not Assigned      | P51786            | ZNF157    | Zinc finger protein 157                                      |
| APRLQSEVAEL  | 1xDeamidated [R3]     | HLA-B*07:02       | P53990            | IST1      | IST1 homolog                                                 |

| Peptide       | Modification              | Allele Assignment | Uniprot accession | Gene Name | Protein Name                                         |
|---------------|---------------------------|-------------------|-------------------|-----------|------------------------------------------------------|
| RGKALRTQL     | 1xDeamidated [R1]         | Not Assigned      | P55058            | PLTP      | Phospholipid transfer protein                        |
| GPREAFRQL     | 1xDeamidated [R7]         | HLA-B*07:02       | P57086            | SCAND1    | SCAN domain-containing protein 1                     |
| NIRNIGKTL     | 1xDeamidated [R3]         | HLA-B*07:02       | P61247            | RPS3A     | 40S ribosomal protein S3a                            |
| RPDDRSQGAIL   | 1xDeamidated [R5]         | HLA-B*07:02       | Q04637            | EIF4G1    | Eukaryotic translation initiation factor 4 gamma 1   |
| KPNGVRQRPIAF  | 1xDeamidated [R6]         | HLA-B*07:02       | Q12766            | HMGXB3    | HMG domain-containing protein 3                      |
| FLYPGKNGRL    | 1xDeamidated [R9]         | HLA-A*02:01       | Q13889            | GTF2H3    | General transcription factor IIH subunit 3           |
| EMAKRRIDEI    | 1xDeamidated [R6]         | Not Assigned      | Q14683            | SMC1A     | Structural maintenance of chromosomes protein 1A     |
| RVDPNGSRYLL   | 1xDeamidated [R8]         | HLA-B*07:02       | Q16531            | DDB1      | DNA damage-binding protein 1                         |
| SPSRNRSLQL    | 1xDeamidated [R4]         | HLA-B*07:02       | Q3KQU3            | MAP7D1    | MAP7 domain-containing protein 1                     |
| RLDAARQAL     | 1xDeamidated [R6]         | HLA-B*07:02       | Q5TZA2            | CROCC     | Rootletin                                            |
| KLFDPRQELKL   | 1xDeamidated [R5]         | HLA-A*02:01       | Q5VZ89            | DENND4C   | DENN domain-containing protein 4C                    |
| RLQEEVHLL     | 1xDeamidated [R1]         | HLA-A*02:01       | Q674X7            | KAZN      | Kazrin                                               |
| RSFERSHRRRISE | 3xDeamidated [R5; R8; R9] | Not Assigned      | Q68DN1            | C2orf16   | Uncharacterized protein C2orf16                      |
| RAATLESLREL   | 2xDeamidated [R1; R9]     | Not Assigned      | Q6NSJ5            | LRRC8E    | Volume-regulated anion channel subunit LRRC8E        |
| RLLGEEVPRPIL  | 1xDeamidated [R9]         | Not Assigned      | Q6SZW1            | SARM1     | Sterile alpha and TIR motif-containing protein 1     |
| RPSLRLQLL     | 1xDeamidated [R5]         | HLA-B*07:02       | Q7L2H7            | EIF3M     | Eukaryotic translation initiation factor 3 subunit M |
| RPVNGVINTL    | 1xDeamidated [R1]         | HLA-B*07:02       | Q7Z3B3            | KANSL1    | KAT8 regulatory NSL complex subunit 1                |
| PQRRIRRWLRRF  | 3xDeamidated [R4; R6; R7] | Not Assigned      | Q7Z3K3            | POGZ      | Pogo transposable element with ZNF domain            |
| LPRNNSIGESL   | 1xDeamidated [R3]         | HLA-B*07:02       | Q86VY9            | TMEM200A  | Transmembrane protein 200A                           |
| SPRVNGLTTVAL  | 1xDeamidated [R3]         | HLA-B*07:02       | Q86YP4            | GATAD2A   | Transcriptional repressor p66-alpha                  |
| DPLLLRCKL     | 1xDeamidated [R6]         | Not Assigned      | Q8IY34            | SLC15A3   | Solute carrier family 15 member 3                    |
| QGRDDHVVITL   | 1xDeamidated [R3]         | Not Assigned      | Q8N0Z2            | ABRA      | Actin-binding Rho-activating protein                 |
| GRRRSRLAL     | 2xDeamidated [R2; R3]     | HLA-C*07:02       | Q8N2H9            | PELI3     | E3 ubiquitin-protein ligase pellino homolog 3        |
| SRRNGNLTAFA   | 1xDeamidated [R3]         | Not Assigned      | Q8N8Q9            | NIPA2     | Magnesium transporter NIPA2                          |
| YRAKSRQLLQ    | 2xDeamidated [R2; R6]     | Not Assigned      | Q8NEE8            | TTC16     | Tetratricopeptide repeat protein 16                  |
| QARLLRAQSL    | 1xDeamidated [R3]         | HLA-B*07:02       | Q8NFW9            | MYRIP     | Rab effector MyRIP                                   |
| RPNGTKVAVLL   | 1xDeamidated [R1]         | HLA-B*07:02       | Q8NHH9            | ATL2      | Atlantin-2                                           |

| Peptide     | Modification           | Allele Assignment | Uniprot accession | Gene Name | Protein Name                                                               |
|-------------|------------------------|-------------------|-------------------|-----------|----------------------------------------------------------------------------|
| RPNGTKVAVL  | 1xDeamidated [R1]      | HLA-B*07:02       | Q8NHH9            | ATL2      | Atlastin-2                                                                 |
| RNPDIRVL    | 1xDeamidated [R1]      | Not Assigned      | Q8TAF3            | WDR48     | WD repeat-containing protein 48                                            |
| KCERIAKAIEV | 1xDeamidated [R4]      | Not Assigned      | Q8TCG1            | CIP2A     | Protein CIP2A                                                              |
| WAGPEERLRR  | 2xDeamidated [R9; R10] | Not Assigned      | Q8WWP7            | GIMAP1    | GTPase IMAP family member 1                                                |
| IRQQRLISI   | 1xDeamidated [R5]      | Not Assigned      | Q92540            | SMG7      | Protein SMG7                                                               |
| RARNISGVVL  | 1xDeamidated [R3]      | HLA-B*07:02       | Q92542            | NCSTN     | Nicastrin                                                                  |
| GVSMRFFTKL  | 1xDeamidated [R5]      | Not Assigned      | Q92835            | INPP5D    | Phosphatidylinositol 3,4,5-trisphosphate 5-phosphatase 1                   |
| PQQLVERL    | 1xDeamidated [R7]      | Not Assigned      | Q93009            | USP7      | Ubiquitin carboxyl-terminal hydrolase 7                                    |
| RPREQNGAIYL | 1xDeamidated [R3]      | HLA-B*07:02       | Q95460            | MR1       | Major histocompatibility complex class I-related gene protein              |
| RIINGIISV   | 1xDeamidated [R1]      | HLA-A*02:01       | Q96D96            | HVCN1     | Voltage-gated hydrogen channel 1                                           |
| RPSVRNGQLL  | 1xDeamidated [R5]      | HLA-B*07:02       | Q96EB1            | ELP4      | Elongator complex protein 4                                                |
| RPNGRVALRTL | 1xDeamidated [R]       | HLA-B*07:02       | Q96HS1            | PGAM5     | Serine/threonine-protein phosphatase PGAM5                                 |
| QGDRERGGSLR | 2xDeamidated [R4; R6]  | Not Assigned      | Q96L73            | NSD1      | Histone-lysine N-methyltransferase, H3 lysine-36 and H4 lysine-20 specific |
| PSRDNPRRLR  | 1xDeamidated [R10]     | Not Assigned      | Q96LA8            | PRMT6     | Protein arginine N-methyltransferase 6                                     |
| RPNGVITGL   | 1xDeamidated [R1]      | HLA-B*07:02       | Q96QD9            | FYTTD1    | UAP56-interacting factor                                                   |
| AFSRLHKL    | 1xDeamidated [R4]      | Not Assigned      | Q9BTN0            | LRFN3     | Leucine-rich repeat and fibronectin type-III domain-containing protein 3   |
| RTSASSVLLSV | 1xDeamidated [R1]      | Not Assigned      | Q9C0C7            | AMBRA1    | Activating molecule in BECN1-regulated autophagy protein 1                 |
| HPEASRKNLVL | 1xDeamidated [R6]      | HLA-B*07:02       | Q9H6T0            | ESRP2     | Epithelial splicing regulatory protein 2                                   |
| APNQRRRLLL  | 1xDeamidated [R6]      | HLA-B*07:02       | Q9NNW5            | WDR6      | WD repeat-containing protein 6                                             |
| KRQEAFEL    | 1xDeamidated [R2]      | HLA-C*07:02       | Q9NR81            | ARHGEF3   | Rho guanine nucleotide exchange factor 3                                   |
| RIPRLILRP   | 2xDeamidated [R1; R4]  | Not Assigned      | Q9NX95            | SYBU      | Syntabulin                                                                 |
| RPNGVSAVAL  | 1xDeamidated [R1]      | HLA-B*07:02       | Q9NZ63            | C9orf78   | Telomere length and silencing protein 1 homolog                            |
| RPIRQILYL   | 1xDeamidated [R4]      | HLA-B*07:02       | Q9UBQ5            | EIF3K     | Eukaryotic translation initiation factor 3 subunit K                       |
| RLPRDLLQVY  | 1xDeamidated [R]       | HLA-B*07:02       | Q9UFD9            | RIMBP3    | RIMS-binding protein 3A                                                    |
| LGRKEVVATLL | 1xDeamidated [R3]      | Not Assigned      | Q9UJG1            | MOSPD1    | Motile sperm domain-containing protein 1                                   |
| RPANHRQLTF  | 1xDeamidated [R6]      | HLA-B*07:02       | Q9UNM6            | PSMD13    | 26S proteasome non-ATPase regulatory subunit 13                            |
| VEAHVRAQLLQ | 1xDeamidated [R6]      | Not Assigned      | Q9UNX9            | KCNJ14    | ATP-sensitive inward rectifier potassium channel 14                        |
| RLRNGTFLTL  | 1xDeamidated [R3]      | HLA-A*02:01       | Q9UQ53            | MGAT4B    | Alpha-1,3-mannosyl-glycoprotein 4-beta-N-acetylglucosaminyltransferase B   |

| <b>Peptide</b> | <b>Modification</b>   | <b>Allele Assignment</b> | <b>Uniprot accession</b> | <b>Gene Name</b> | <b>Protein Name</b>                       |
|----------------|-----------------------|--------------------------|--------------------------|------------------|-------------------------------------------|
| VLLDVNGHIRL    | 1xDeamidated [R10]    | HLA-A*02:01              | Q9Y5S2                   | CDC42BPB         | Serine/threonine-protein kinase MRCK beta |
| RAYLRNRSKL     | 2xDeamidated [R5; R7] | HLA-B*07:02              | Q9Y605                   | MRFAP1           | MORF4 family-associated protein 1         |
| TPRLQEGSLSS    | 1xDeamidated [R3]     | Not Assigned             | Q9Y618                   | NCOR2            | Nuclear receptor corepressor 2            |

(B) Citrullinated peptides identified by SCX

| Peptide      | Modification           | Allele Assignment | Uniprot accession | Gene Name | Protein Name                                          |
|--------------|------------------------|-------------------|-------------------|-----------|-------------------------------------------------------|
| ARNRRGRARRL  | 2xDeamidated [R9; R10] | Not Assigned      | I0J062            | PANO1     | Proapoptotic nucleolar protein 1                      |
| GSANINDRSLLG | 1xDeamidated [R8]      | Not Assigned      | O14939            | PLD2      | Phospholipase D2                                      |
| RPQRATSNVF   | 1xDeamidated [R4]      | HLA-B*07:02       | O14950            | MYL12B    | Myosin regulatory light chain 12B                     |
| VPNQKRLTLL   | 1xDeamidated [R6]      | HLA-B*07:02       | O60488            | ACSL4     | Long-chain-fatty-acid--CoA ligase 4                   |
| DRRPGIIVDL   | 2xDeamidated [R2; R3]  | Not Assigned      | O76041            | NEBL      | Nebulette                                             |
| KARAQAEAL    | 1xDeamidated [R3]      | HLA-B*07:02       | O95503            | CBX6      | Chromobox protein homolog 6                           |
| RRVDAENRL    | 1xDeamidated [R8]      | Not Assigned      | P02545            | LMNA      | Prelamin-A/C                                          |
| YDSMKGKGTRD  | 1xDeamidated [R10]     | Not Assigned      | P07355            | ANXA2     | Annexin A2                                            |
| DGSRHSWSHHHE | 1xDeamidated [R4]      | Not Assigned      | P20930            | FLG       | Filaggrin                                             |
| YESTRKENL    | 1xDeamidated [R5]      | Not Assigned      | P20930            | FLG       | Filaggrin                                             |
| EKNKTENTRLGD | 1xDeamidated [R9]      | Not Assigned      | P20930            | FLG       | Filaggrin                                             |
| SPTHREEEY    | 1xDeamidated [R5]      | Not Assigned      | P20930            | FLG       | Filaggrin                                             |
| YSPTHREEE    | 1xDeamidated [R6]      | Not Assigned      | P20930            | FLG       | Filaggrin                                             |
| SPNQARAQAAL  | 1xDeamidated [R6]      | HLA-B*07:02       | P26599            | PTBP1     | Polypyrimidine tract-binding protein 1                |
| APRQRPESAL   | 1xDeamidated [R6]      | HLA-B*07:02       | P28062            | PSMB8     | Proteasome subunit beta type-8                        |
| SPRNQQLHTVTL | 1xDeamidated [R3]      | HLA-B*07:02       | P32519            | ELF1      | ETS-related transcription factor Elf-1                |
| RLAQHITYV    | 1xDeamidated [R1]      | HLA-A*02:01       | P33993            | MCM7      | DNA replication licensing factor MCM7                 |
| NPRNFSDNQL   | 1xDeamidated [R3]      | HLA-B*07:02       | P37802            | TAGLN2    | Transgelin-2                                          |
| ANAPEESRKKIN | 1xDeamidated [R8]      | Not Assigned      | P48594            | SERPINB4  | Serpin B4                                             |
| RGKALRTQL    | 1xDeamidated [R1]      | Not Assigned      | P55058            | PLTP      | Phospholipid transfer protein                         |
| EPIKREDEEE   | 1xDeamidated [R5]      | Not Assigned      | P55072            | VCP       | Transitional endoplasmic reticulum ATPase             |
| ALREQQLQQE   | 1xDeamidated [R3]      | Not Assigned      | P56524            | HDAC4     | Histone deacetylase 4                                 |
| GPREAFRQL    | 1xDeamidated [R7]      | HLA-B*07:02       | P57086            | SCAND1    | SCAN domain-containing protein 1                      |
| NIRNIGKTL    | 1xDeamidated [R3]      | HLA-B*07:02       | P61247            | RPS3A     | 40S ribosomal protein S3a                             |
| RPSSQYIVAL   | 1xDeamidated [R1]      | HLA-B*07:02       | Q01650            | SLC7A5    | Large neutral amino acids transporter small subunit 1 |

| Peptide      | Modification               | Allele Assignment | Uniprot accession | Gene Name | Protein Name                                              |
|--------------|----------------------------|-------------------|-------------------|-----------|-----------------------------------------------------------|
| PEKRRRQEL    | 1xDeamidated [R4]          | Not Assigned      | Q07283            | TCHH      | Trichohyalin                                              |
| APHARNGLSL   | 1xDeamidated [R5]          | HLA-B*07:02       | Q13422            | IKZF1     | DNA-binding protein Ikaros                                |
| RPRARYVQV    | 1xDeamidated [R5]          | HLA-B*07:02       | Q14213            | EBI3      | Interleukin-27 subunit beta                               |
| KPEEQRQAL    | 1xDeamidated [R6]          | HLA-B*07:02       | Q15149            | PLEC      | Plectin                                                   |
| APREGQGSSAV  | 1xDeamidated [R3]          | HLA-B*07:02       | Q16566            | CAMK4     | Calcium/calmodulin-dependent protein kinase type IV       |
| PSRRSTKR     | 1xDeamidated [R8]          | Not Assigned      | Q2WVGJ9           | FER1L6    | Fer-1-like protein 6                                      |
| SPSRNRSLQL   | 1xDeamidated [R]           | HLA-B*07:02       | Q3KQU3            | MAP7D1    | MAP7 domain-containing protein 1                          |
| PVWIKETRTRHL | 1xDeamidated [R10]         | Not Assigned      | Q5D0E6            | DALRD3    | DALR anticodon-binding domain-containing protein 3        |
| KRGRRNNSVGSL | 2xDeamidated [R4; R5]      | Not Assigned      | Q5JU85            | IQSEC2    | IQ motif and SEC7 domain-containing protein 2             |
| NRVLREDNRRL  | 2xDeamidated [R5; R9]      | Not Assigned      | Q5VU43            | PDE4DIP   | Myomegalin                                                |
| RSFERSHRRISE | 3xDeamidated [R5; R8; R9]  | Not Assigned      | Q68DN1            | C2orf16   | Uncharacterized protein C2orf16                           |
| RLGHQKYKSKI  | 1xDeamidated [R1]          | Not Assigned      | Q6DN14            | MCTP1     | Multiple C2 and transmembrane domain-containing protein 1 |
| APSQQRQQIA   | 1xDeamidated [R6]          | HLA-B*07:02       | Q6P2Q9            | PRPF8     | Pre-mRNA-processing-splicing factor 8                     |
| APSQQRQQI    | 1xDeamidated [R6]          | HLA-B*07:02       | Q6P2Q9            | PRPF8     | Pre-mRNA-processing-splicing factor 8                     |
| CGKFFRHSSSL  | 1xDeamidated [R6]          | Not Assigned      | Q6PK81            | ZNF773    | Zinc finger protein 773                                   |
| SPRQERLNFWL  | 1xDeamidated [R6]          | HLA-B*07:02       | Q6ZN16            | MAP3K15   | Mitogen-activated protein kinase kinase kinase 15         |
| RVSLIKQR     | 1xDeamidated [R8]          | Not Assigned      | Q75QN2            | INTS8     | Integrator complex subunit 8                              |
| RPSLRQLL     | 1xDeamidated [R5]          | HLA-B*07:02       | Q7L2H7            | EIF3M     | Eukaryotic translation initiation factor 3 subunit M      |
| PRRFSRSLSRT  | 1xDeamidated [R10]         | Not Assigned      | Q7L4I2            | RSRC2     | Arginine/serine-rich coiled-coil protein 2                |
| RPVNGVINTL   | 1xDeamidated [R1]          | HLA-B*07:02       | Q7Z3B3            | KANSL1    | KAT8 regulatory NSL complex subunit 1                     |
| RPEARRPRGPR  | 3xDeamidated [R6; R8; R11] | HLA-B*07:02       | Q86TL0            | ATG4D     | Cysteine protease ATG4D                                   |
| GRRRSRLAL    | 2xDeamidated [R2; R3]      | HLA-C*07:02       | Q8N2H9            | PELI3     | E3 ubiquitin-protein ligase pellino homolog 3             |
| KSFYSSSF     | 1xDeamidated [R4]          | Not Assigned      | Q8NCK3            | ZNF485    | Zinc finger protein 485                                   |
| TPRNLNRSLQ   | 1xDeamidated [R3]          | HLA-B*07:02       | Q8NCN4            | RNF169    | E3 ubiquitin-protein ligase RNF169                        |
| IKRIRREL     | 1xDeamidated [R5]          | Not Assigned      | Q8TCB0            | IFI44     | Interferon-induced protein 44                             |
| RARNISGVVL   | 1xDeamidated [R3]          | HLA-B*07:02       | Q92542            | NCSTN     | Nicastrin                                                 |
| KPQGQRTSL    | 1xDeamidated [R6]          | HLA-B*07:02       | Q92547            | TOPBP1    | DNA topoisomerase 2-binding protein 1                     |

| Peptide      | Modification           | Allele Assignment | Uniprot accession | Gene Name | Protein Name                                                       |
|--------------|------------------------|-------------------|-------------------|-----------|--------------------------------------------------------------------|
| GVSMRFFTKL   | 1xDeamidated [R5]      | Not Assigned      | Q92835            | INPP5D    | Phosphatidylinositol 3,4,5-trisphosphate 5-phosphatase 1           |
| RPSLGRVL     | 1xDeamidated [R6]      | HLA-B*07:02       | Q96AB3            | ISOC2     | Isochorismatase domain-containing protein 2                        |
| STRWLLVVV    | 1xDeamidated [R3]      | Not Assigned      | Q96EY1            | DNAJA3    | DnaJ homolog subfamily A member 3, mitochondrial                   |
| RPNGVITGL    | 1xDeamidated [R1]      | HLA-B*07:02       | Q96QD9            | FYTTD1    | UAP56-interacting factor                                           |
| HPEASRKNLVL  | 1xDeamidated [R6]      | HLA-B*07:02       | Q9H6T0            | ESRP2     | Epithelial splicing regulatory protein 2                           |
| LPRNSKTRPESI | 1xDeamidated [R8]      | HLA-B*07:02       | Q9HAU0            | PLEKHA5   | Pleckstrin homology domain-containing family A member 5            |
| PRSSSDNRNFLR | 2xDeamidated [R8; R12] | Not Assigned      | Q9HBU6            | ETNK1     | Ethanolamine kinase 1                                              |
| IPQKQREITL   | 1xDeamidated [R6]      | HLA-B*07:02       | Q9NR30            | DDX21     | Nucleolar RNA helicase 2                                           |
| QEFLTAAKKAR  | 1xDeamidated [R11]     | Not Assigned      | Q9NZT1            | CALML5    | Calmodulin-like protein 5                                          |
| LPDLQRSKQAL  | 1xDeamidated [R6]      | HLA-B*07:02       | Q9UL45            | BLOC1S6   | Biogenesis of lysosome-related organelles complex 1 subunit 6      |
| RPANHRQLTF   | 1xDeamidated [R6]      | HLA-B*07:02       | Q9UNM6            | PSMD13    | 26S proteasome non-ATPase regulatory subunit 13                    |
| RADSIGSGRA   | 1xDeamidated [R9]      | Not Assigned      | Q9UPQ3            | AGAP1     | Arf-GAP with GTPase, ANK repeat and PH domain-containing protein 1 |
| RVNNNRGNSL   | 1xDeamidated [R1]      | HLA-B*07:02       | Q9Y5M8            | SRPRB     | Signal recognition particle receptor subunit beta                  |

(C) Citrullinated peptides identified without fractionation

| Peptide      | Modification           | Allele Assignment | Uniprot accession | Gene Name | Protein Name                                              |
|--------------|------------------------|-------------------|-------------------|-----------|-----------------------------------------------------------|
| LPRNNSIGESL  | 1xDeamidated [R3]      | HLA-B*07:02       | Q86VY9            | TMEM200A  | Transmembrane protein 200A                                |
| RLLNNTDVYL   | 1xDeamidated [R1]      | HLA-A*02:01       | O75976            | CPD       | Carboxypeptidase D                                        |
| RAATLESLREL  | 2xDeamidated [R1; R9]  | Not Assigned      | Q6NSJ5            | LRRC8E    | Volume-regulated anion channel subunit LRRC8E             |
| RARNISGVVL   | 1xDeamidated [R3]      | HLA-B*07:02       | Q92542            | NCSTN     | Nicastrin                                                 |
| SLRPIGNIVLI  | 1xDeamidated [R3]      | Not Assigned      | O95180            | CACNA1H   | Voltage-dependent T-type calcium channel subunit alpha-1H |
| PRRFSRSLSRT  | 1xDeamidated [R]       | Not Assigned      | Q7L4I2            | RSRC2     | Arginine/serine-rich coiled-coil protein 2                |
| NPRNFSDNQL   | 1xDeamidated [R3]      | HLA-B*07:02       | P37802            | TAGLN2    | Transgelin-2                                              |
| LNQGARVNARD  | 2xDeamidated [R6; R10] | Not Assigned      | Q86SG2            | ANKRD23   | Ankyrin repeat domain-containing protein 23               |
| QFIEEIRQL    | 1xDeamidated [R7]      | Not Assigned      | Q96LB3            | IFT74     | Intraflagellar transport protein 74 homolog               |
| APRANLTVVLL  | 1xDeamidated [R3]      | HLA-B*07:02       | P05362            | ICAM1     | Intercellular adhesion molecule 1                         |
| HSRPLLLAL    | 1xDeamidated [R3]      | HLA-B*07:02       | Q9NXH8            | TOR4A     | Torsin-4A                                                 |
| RLMEDRNARL   | 2xDeamidated [R6; R9]  | HLA-B*07:02       | P59046            | NLRP12    | NACHT, LRR and PYD domains-containing protein 12          |
| LRQDLRDGVIL  | 1xDeamidated [R2]      | Not Assigned      | Q155Q3            | DIXDC1    | Dixin                                                     |
| SPRQERLNFWL  | 1xDeamidated [R6]      | HLA-B*07:02       | Q6ZN16            | MAP3K15   | Mitogen-activated protein kinase kinase kinase 15         |
| ISRENAKNSL   | 1xDeamidated [R3]      | Not Assigned      | P01766            | IGHV3-13  | Immunoglobulin heavy variable 3-13                        |
| RDQGRQVYLSR  | 1xDeamidated [R1]      | Not Assigned      | Q08345            | DDR1      | Epithelial discoidin domain-containing receptor 1         |
| MDRVEEILEL   | 1xDeamidated [R3]      | Not Assigned      | A6PVC2            | TTL8      | Protein monoglycylase TTL8                                |
| KSFYSSSF     | 1xDeamidated [R4]      | Not Assigned      | Q8NCK3            | ZNF485    | Zinc finger protein 485                                   |
| ESRRSSLLSLM  | 2xDeamidated [R3; R4]  | Not Assigned      | Q6WKZ4            | RAB11FIP1 | Rab11 family-interacting protein 1                        |
| PRSSPSGREASL | 1xDeamidated [R8]      | HLA-B*07:02       | Q6NUI2            | GPAT2     | Glycerol-3-phosphate acyltransferase 2, mitochondrial     |
| VRVEHRVSSLQL | 2xDeamidated [R2; R6]  | Not Assigned      | Q9NRJ4            | TULP4     | Tubby-related protein 4                                   |
| RVSELEKTQVA  | 1xDeamidated [R1]      | Not Assigned      | Q7Z7A1            | CNTRL     | Centriolin                                                |
| RRPLYKNIVL   | 1xDeamidated [R1]      | HLA-B*07:02       | P61158            | ACTR3     | Actin-related protein 3                                   |
| RVQRHLELL    | 2xDeamidated [R1; R4]  | Not Assigned      | Q86UT6            | NLRX1     | NLR family member X1                                      |
| SGDLMIRNIQL  | 1xDeamidated [R7]      | Not Assigned      | Q9P232            | CNTN3     | Contactin-3                                               |
| SRSEKDYRL    | 1xDeamidated [R2]      | Not Assigned      | Q9P2F5            | STOX2     | Storkhead-box protein 2                                   |



| Peptide     | Modification          | Allele Assignment | Uniprot accession | Gene Name | Protein Name                                                   |
|-------------|-----------------------|-------------------|-------------------|-----------|----------------------------------------------------------------|
| APRANLTVVL  | 1xDeamidated [R3]     | HLA-B*07:02       | P05362            | ICAM1     | Intercellular adhesion molecule 1                              |
| PRTCLSLLSL  | 1xDeamidated [R2]     | Not Assigned      | Q70UQ0            | IKBIP     | Inhibitor of nuclear factor kappa-B kinase-interacting protein |
| RVNNSIDGVSL | 1xDeamidated [R1]     | Not Assigned      | P78312            | FAM193A   | Protein FAM193A                                                |
| RILRDTRILLI | 1xDeamidated [R1]     | Not Assigned      | Q9H845            | ACAD9     | Acyl-CoA dehydrogenase family member 9, mitochondrial          |
| RVLNVSYNV   | 1xDeamidated [R1]     | HLA-A*02:01       | Q86YC3            | NRROS     | Negative regulator of reactive oxygen species                  |
| KCERIAKAIEV | 1xDeamidated [R4]     | Not Assigned      | Q8TCG1            | CIP2A     | Protein CIP2A                                                  |
| RPRYLEIRAV  | 1xDeamidated [R8]     | HLA-B*07:02       | Q9HAV4            | XPO5      | Exportin-5                                                     |
| KEEEIRKYSI  | 1xDeamidated [R6]     | Not Assigned      | Q15742            | NAB2      | NGFI-A-binding protein 2                                       |
| NRRLQQHLL   | 2xDeamidated [R2; R3] | Not Assigned      | A6NKD9            | CCDC85C   | Coiled-coil domain-containing protein 85C                      |
| RMFNRTYKL   | 1xDeamidated [R5]     | HLA-A*02:01       | O75354            | ENTPD6    | Ectonucleoside triphosphate diphosphohydrolase 6               |
